# Supplementary material
Source: Springer Nature journal article supplement (https://www.springermedizin.de/resource/supplementary/12885_2008_1574_MOESM1_ESM.pdf/9472360)

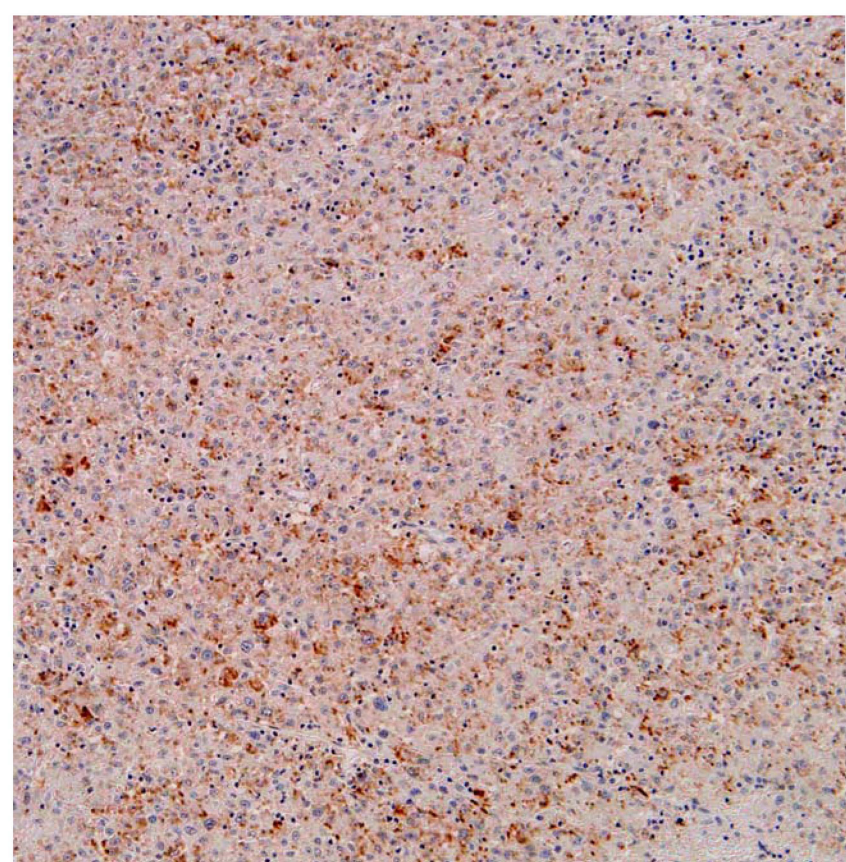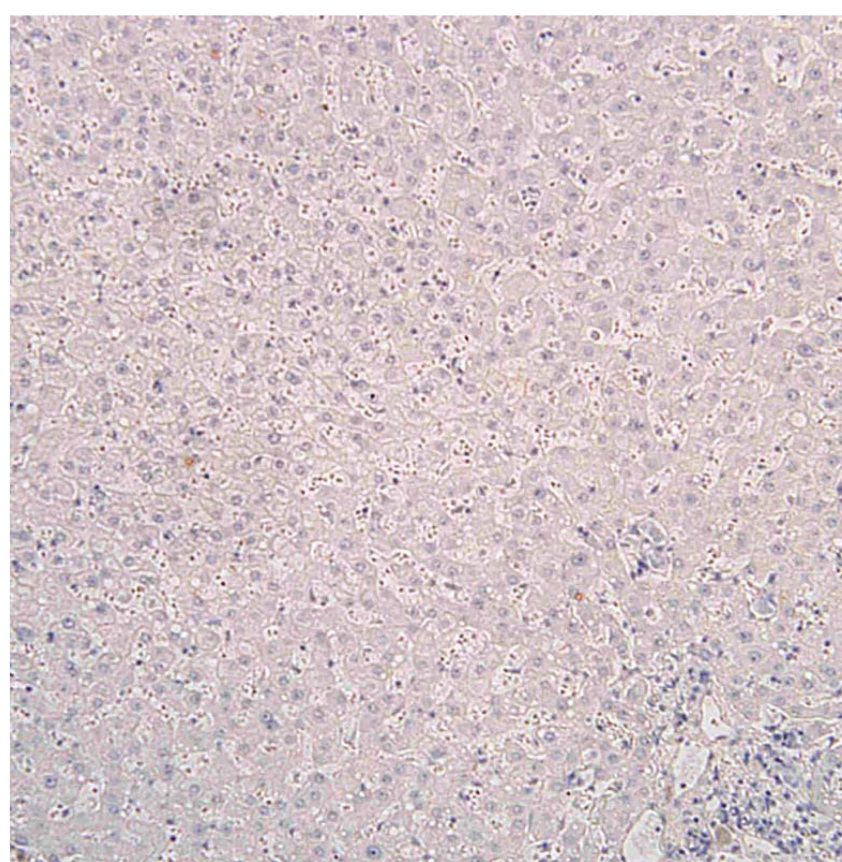

Supplement: MOESM1 [file 9472360]
